# Supplementary material for: Improving Clinician’s Pain Assessment, Documentation and Analgesic Prescription Practices
Source: Research Square preprint supplement (doi:10.21203/rs.3.rs-4598121/v2), 2025-04-28
Supplement: Supplementary file 1 [file d9db4979df301dad71415235.pdf]

# Improving Pain Scoring and Documentation Practices Among Clinicians.

A data collection checklist on the pain scoring and documntation practice of clinicians at FPRRH

\* Indicates required question

---

1. **Week \***

---

2. **Ward \***

*Mark only one oval.*

- ☐ Medical Ward
- ☐ GYN Ward
- ☐ Pead Ward
- ☐ Surgical Ward

3. **Is pain one of the presenting complaints? \***

*Mark only one oval.*

- ☐ Yes
- ☐ No

**4. Patient age in years**

*Mark only one oval.*

- ☐ 3-11
- ☐ 12-18
- ☐ 19 and above

**5. Diagnosis**

---

**6. Based on diagnosis, is the patient's pain acute or chronic**

*Mark only one oval.*

- ☐ Acute
- ☐ Chronic

**7. Is pain score documented**

*Mark only one oval.*

- ☐ Yes
- ☐ No

**8. Documented pain severity**

*Mark only one oval.*

- ☐ Mild
- ☐ Moderate
- ☐ Severe
- ☐ None

9. **Is analgesic prescribed**

*Mark only one oval.*

☐ Yes

☐ No

10. **Type of analgesic prescribed**

*Mark only one oval.*

☐ NSAID

☐ Weak Opioid

☐ Strong Opioid

☐ Adjuvant analgesic

11. **Is the analgesic prescribed appropriate for the pain score or severity documented?**

*Mark only one oval.*

☐ Yes

☐ No

---

This content is neither created nor endorsed by Google.

**Google Forms**
